# Supplementary material
Source: MDPI journal article supplement (https://www.mdpi.com/2313-0105/6/2/30)
Supplement: s1 [file s1]

Archive with 2 entries (2 files):
- SEM_images_of_particle_classes.docx
- SEM_images_of_particle_classes.pdf
